# Supplementary material for: Restoration of ceramidede novosynthesis by the synthetic retinoid ST1926 as it induces adult T-cell leukemia cell death
Source: Oxford University Press journal article supplement (doi:10.1042/bsr20200050), 2020-10-01
Supplement: bsr-2020-0050_supp.pdf [file bsr-2020-0050_supp.pdf]

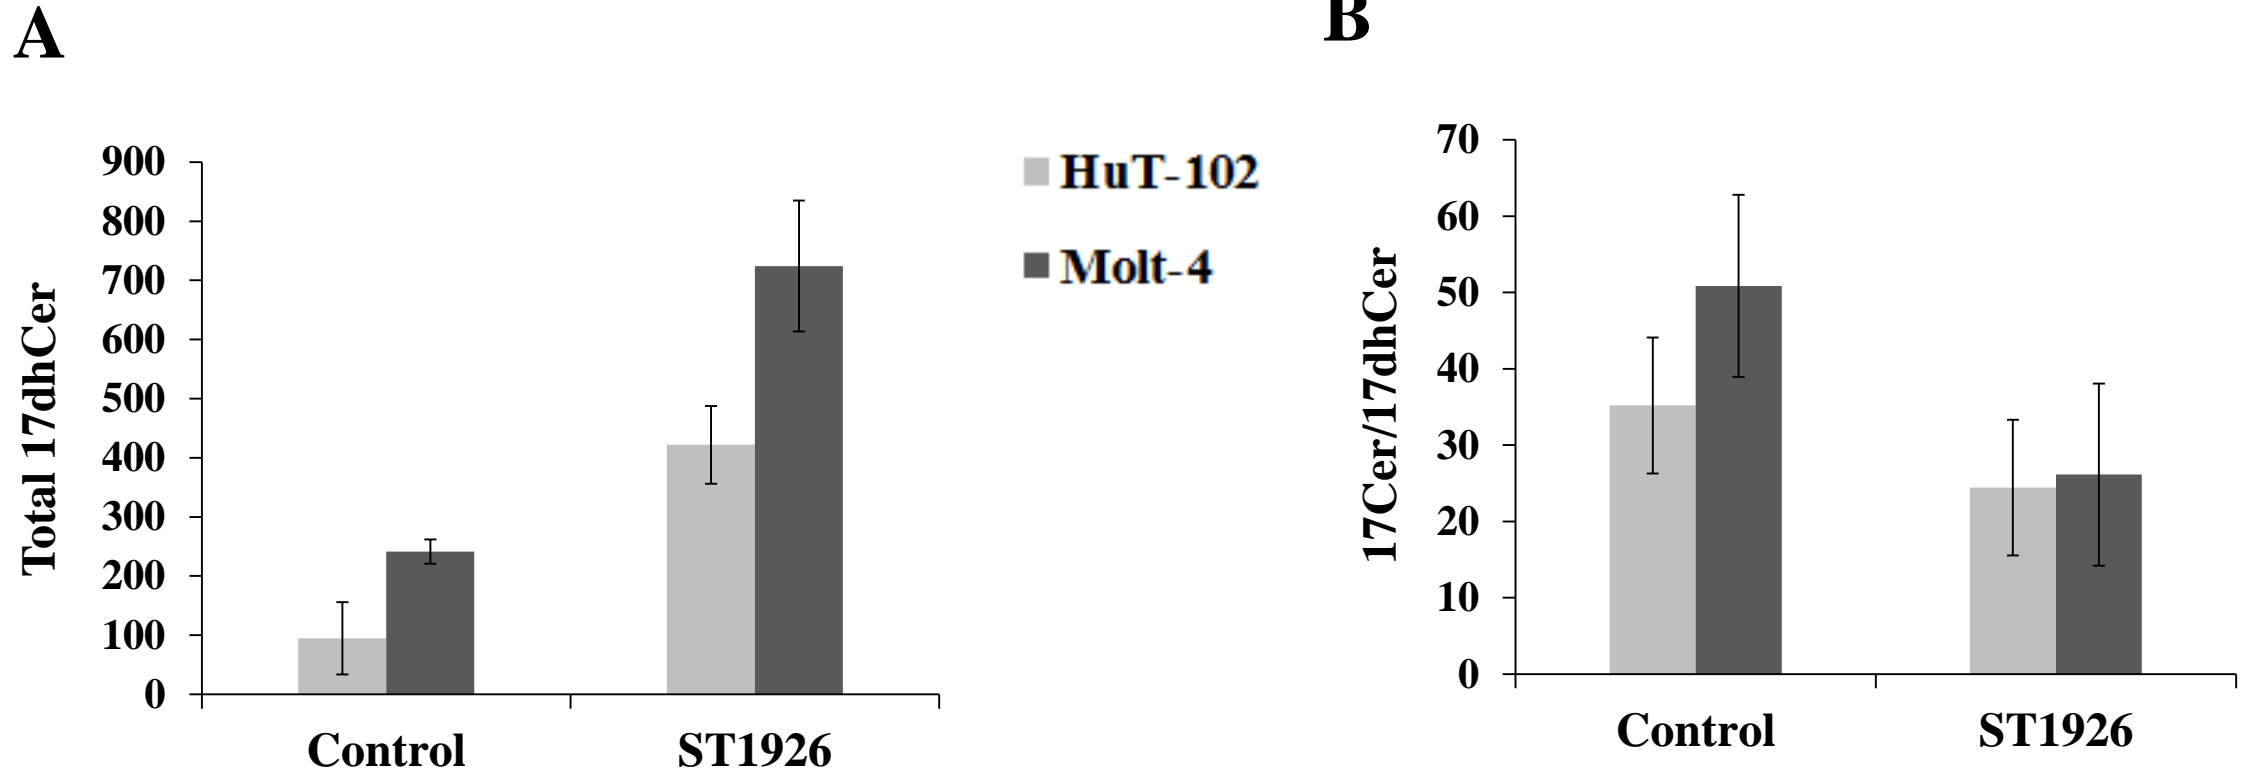

**Supplementary Figure 1. Effect of ST1926 on total levels of 17dhCer, and ratio of total 17Cer to 17dhCer species in HTLV-1 positive and negative malignant T cells.**

**(A)** HTLV-1 positive (HuT-102) cells has lower basal levels of 17C-dihydroceramide (17dhCer species) than Molt-4 cells, and treatment with ST1926 increased 17dhCer levels in both HuT-102 and Molt-4 cells, while **(B)** there was no significant change in the ratio of 17Cer/17dhCer species upon ST1926 treatment in both cell lines, or in the basal level ratios of 17Cer/17dhCer species between the two cell lines. Cells were seeded at a density of  $3 \times 10^5$  cells/ml, labeled with 4  $\mu$ M of unnatural 17C-sphinganine and treated with either 0.1% DMSO as control or 1  $\mu$ M ST1926 for 24h. 17dhCer species levels (pmol) were measured in lyophilized samples as duplicates by LC/MS as described in Methods and normalized to total cellular lipid phosphate levels ( $\mu$ mol). Data points represent the mean  $\pm$  range (n=2). Results are representative of two independent experiments.

## Supplementary Table 1

Percent increase in individual 17dhCer species in HuT-102 and Molt-4 cells

|                | <b>Total 17dhCer</b> | <b>17dhC16</b><br>(% Total 17dhCer) | <b>17dhC22</b><br>(% Total 17dhCer) | <b>17dhC24:1</b><br>(% Total dhCer) |
|----------------|----------------------|-------------------------------------|-------------------------------------|-------------------------------------|
| <b>HuT-102</b> | 327                  | 48                                  | 7                                   | 12                                  |
| <b>Molt-4</b>  | 483                  | 71                                  | 2                                   | 6                                   |

**Supplementary Table 1. Percent accumulation of 17dhC16, 17dhC22, and 17dhC24:1 in HTLV-1 positive (HuT-102) and negative (Molt-4) malignant T cells, representing most prominent increase in their respective categories of medium long chain (MLC), long chain (LC), and very long chain (VLC) 17dhCer.**

Cells were seeded at a density of  $3 \times 10^5$  cells/ml and treated with 0.1% DMSO as control or  $1 \mu\text{M}$  ST1926 for 24h. 17dhCer species levels (pmol) were measured in lyophilized samples as duplicates by LC/MS as described in Methods and normalized to total cellular lipid phosphate levels ( $\mu\text{mol}$ ). Data points represent the mean  $\pm$  range (n=2). Results are representative of two independent experiments.
